# Supplementary material for: Dosing and treatment duration of suppressive antimicrobial therapy in orthopedic implant infections: a cohort study
Source: Copernicus journal article supplement (doi:10.5194/jbji-9-149-2024), 2024-06-04
Supplement: Supplementary file [file jbji-9-149-2024-supplement.pdf]

Supplement of J. Bone Joint Infect., 9, 149–159, 2024  
<https://doi.org/10.5194/jbji-9-149-2024-supplement>  
© Author(s) 2024. CC BY 4.0 License.

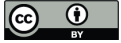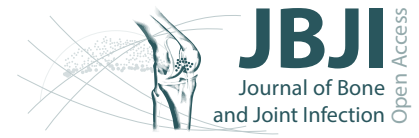

*Supplement of*

## **Dosing and treatment duration of suppressive antimicrobial therapy in orthopedic implant infections: a cohort study**

**Jaap L. J. Hanssen et al.**

*Correspondence to:* Jaap L. J. Hanssen ([j.l.j.hanssen@lumc.nl](mailto:j.l.j.hanssen@lumc.nl))

The copyright of individual parts of the supplement might differ from the article licence.

**Table S1** diagnostic criteria of the 19 patients that did not receive surgery for the orthopedic implant infection.

| Infection     | Diagnosis <sup>a</sup> | Diagnostic criteria <sup>a</sup>                                                                                  | Microorganism                      |
|---------------|------------------------|-------------------------------------------------------------------------------------------------------------------|------------------------------------|
| FRI upper arm | confirmed              | Fistula, positive culture from aspiration                                                                         | <i>Cutibacterium acnes</i>         |
| PJI hip       | likely                 | fever, wound healing history, CRP >10mg/l, positive culture from aspiration                                       | <i>Streptococcus agalactiae</i>    |
| PJI hip       | likely                 | fever, wound healing history, CRP >10mg/l, positive culture from aspiration                                       | <i>Staphylococcus epidermidis</i>  |
| PJI hip       | likely                 | Fever, purulence prosthesis, CRP >10mg, positive culture from aspiration                                          | Group B <i>Streptococci</i>        |
| FRI leg       | confirmed              | Fistula, positive culture from aspiration,                                                                        | <i>Cutibacterium acnes</i>         |
| PJI knee      | likely                 | Radiological loosening, CRP >10mg/ml, positive culture from aspiration                                            | <i>Staphylococcus haemolyticus</i> |
| FRI pelvis    | suggestive             | Bacteremia, fever, pain, PET suggestive of infection                                                              | <i>Staphylococcus aureus</i>       |
| PJI shoulder  | likely                 | Fever, pain, CRP>10mg/L, PET suggestive of infection, positive culture from aspiration                            | <i>Cutibacterium C. acnes</i>      |
| PJI hip       | likely                 | Fever, pain, CRP>10mg/L, ultrasound suggestive of infection, positive culture from aspiration                     | <i>Staphylococcus aureus</i>       |
| PJI hip       | likely                 | Fever, pain, CRP>10mg/L, ultrasound suggestive of infection, positive culture from aspiration                     | <i>Staphylococcus aureus</i>       |
| FRI elbow     | suggestive             | Pain, redness, CRP>10mg/L, ultrasound suggestive of infection, positive culture from aspiration                   | <i>Staphylococcus epidermidis</i>  |
| SII           | suggestive             | Pain, fever, CRP>10mg/L, CT suggestive of infection, positive culture from CT guided aspiration                   | <i>Staphylococcus aureus</i>       |
| PJI knee      | suggestive             | Fever, pain, redness, previous wound healing problems CRP>10mg/L, positive culture from aspiration                | <i>Staphylococcus aureus</i>       |
| PJI hip       | confirmed              | >2 intraoperative cultures                                                                                        | <i>Staphylococcus haemolyticus</i> |
| PJI knee      | suggestive             | Recent bacteremia, fever, redness, CRP>10mg/L, positive culture from aspiration                                   | <i>Streptococcus oralis</i>        |
| PJI shoulder  | suggestive             | Redness, radiological signs of loosening, CRP>10mg/L, positive culture from aspiration                            | <i>Cutibacterium acnes</i>         |
| PJI shoulder  | suggestive             | Fever, redness, CRP>10mg/L, positive culture from aspiration (pus)                                                | <i>Cutibacterium acnes</i>         |
| PJI elbow     | confirmed              | Fistula, positive culture from aspiration                                                                         | <i>Enterobacter cloacae</i>        |
| PJI knee      | suggestive             | Redness, pain, radiological loosening, ultrasound suggestive of infection, positive culture from aspiration (pus) | <i>Staphylococcus epidermidis</i>  |

The abbreviations used in the table are as follows: FRI – fracture related infection; PJI - prosthetic joint infection; SII – spinal implant infection. <sup>a</sup> according to EBJIS 2021 criteria for PJI and the AO Foundation and EBJIS 2020 consensus definition for FRI.

**Table S2** Characteristics of the antibiotic prescribed for suppressive antimicrobial treatment (SAT) in 108 patients with an orthopaedic implant infection

| Antibiotic                    | Number of prescriptions (n, %) | Daily dosage (n)                                                                                                                                    | Duration SAT in month mean (range) | Failure (n, %) |
|-------------------------------|--------------------------------|-----------------------------------------------------------------------------------------------------------------------------------------------------|------------------------------------|----------------|
| Flucloxacillin                | 26                             | 1000 mg q.i.d. (3)<br>1000 mg t.i.d. (3)<br>1000 mg b.i.d. (12)<br>500 mg q.i.d. (1)<br>500 mg t.i.d. (1)<br>500 mg b.i.d. (6)                      | 11 (1-91)                          | 7 (27)         |
| Amoxicillin                   | 25                             | 1000 mg q.i.d. (3)<br>1000 mg t.i.d. (1)<br>1000 mg b.i.d. (10)<br>500 mg q.i.d. (2)<br>500 mg t.i.d. (1)<br>500 mg b.i.d. (7)<br>750 mg b.i.d. (1) | 18 (1-81)                          | 3 (12)         |
| Amoxicillin/clavulanic acid   | 6                              | 1250 mg t.i.d. (1)<br>1250 mg b.i.d. (1)<br>625 mg b.i.d. (4)                                                                                       | 7 (1-26)                           | 2 (33)         |
| Feneticillin                  | 3                              | 500 mg q.i.d. (2)<br>500 mg b.i.d. (1)                                                                                                              | 32 (20-41)                         | 2 (66)         |
| Clindamycin                   | 31                             | 600 mg t.i.d. (3)<br>600 mg b.i.d. (20)<br>300 mg b.i.d. (5)<br>300 mg t.i.d. (4)                                                                   | 18 (1-117)                         | 7 (22)         |
| Sulfamethoxazole/trimethoprim | 18                             | 960 mg b.i.d. (5)<br>960 mg q.d. (11)<br>480 mg q.d. (2)                                                                                            | 16 (4-62)                          | 4 (22)         |
| Doxycycline                   | 14                             | 100 mg q.d. (14)                                                                                                                                    | 23 (5-62)                          | 2 (14)         |
| Ciprofloxacin                 | 9                              | 750 mg b.i.d. (4)<br>500 mg b.i.d. (1)<br>750 mg q.d. (3)<br>500 mg q.d. (1)                                                                        | 23 (1-69)                          | 3 (30)         |
| Levofloxacin                  | 5                              | 500 mg q.d. (4)<br>250mg q.d. (1)                                                                                                                   | 22 (1-33)                          | 1 (20)         |
| Moxifloxacin                  | 3                              | 400 mg q.d. (3)                                                                                                                                     | 10 (4-92)                          | 0              |
| Linezolid                     | 3                              | 600 mg q.d. (1)<br>300 mg q.d. (1)<br>150 mg q.d. (1)                                                                                               | 11 (9-33)                          | 1 (33)         |
| Rifampicin                    | 2                              | 300 mg q.d. (2)                                                                                                                                     | 21-22                              | 1 (50)         |
| Fluconazole                   | 3                              | 200 mg q.d. (3)                                                                                                                                     | 17 (1-117)                         | 1 (33)         |

The abbreviations used in the table are as follows: q.d. - once daily; b.i.d. - twice daily; t.i.d. - three times a day; q.i.d. - four times a day.

**Table S3** Microbiological characteristics of the index pathogens of the 34 patients with failure on suppressive antimicrobial treatment (SAT)

|                                  | All failures (%) | Relapse with index pathogen | Development of SAT resistance | New infection with different pathogen | Culture negative | No tissue for cultures obtained |
|----------------------------------|------------------|-----------------------------|-------------------------------|---------------------------------------|------------------|---------------------------------|
| Number of patients (%)           | 34 (100)         | 11 (32)                     | 4 (12)                        | 9 (26)                                | 7 (21)           | 7 (21)                          |
| Index pathogen                   |                  |                             |                               |                                       |                  |                                 |
| <i>Staphylococcus aureus</i>     | 8 (24)           | 2                           | 1                             | 3                                     | 1                | 2                               |
| Coagulase negative staphylococci | 14 (41)          | 4                           | 2                             | 4                                     | 4                | 2                               |
| <i>S. epidermidis</i>            | 11               | 4                           | 2                             | 3                                     | 3                | 1                               |
| <i>S. hemolyticus</i>            | 2                |                             |                               | 1                                     |                  | 1                               |
| <i>S. capitis</i>                | 1                |                             |                               |                                       | 1                |                                 |
| Gram negative species            | 12 (35)          | 4                           |                               | 5                                     | 2                | 1                               |
| <i>Pseudomonas aeruginosa</i>    | 4 (9)            | 1                           |                               | 2                                     | 1                |                                 |
| <i>E. coli</i>                   | 1                |                             |                               | 1                                     |                  |                                 |
| <i>Acinetobacter baumannii</i>   | 1                |                             |                               | 1                                     |                  |                                 |
| <i>Proteus mirabilis</i>         | 3                | 2                           |                               |                                       |                  | 1                               |
| <i>Enterobacter cloacae</i>      | 3                | 1                           |                               | 1                                     | 1                |                                 |
| Enterococci                      | 8 (24)           | 2                           |                               | 3                                     | 2                | 1                               |
| <i>E. faecalis</i>               | 6                | 1                           |                               | 3                                     | 1                | 1                               |
| <i>E. faecium</i>                | 2                | 1                           |                               |                                       | 1                |                                 |
| Streptococci                     | 3 (9)            | 1                           | 0                             |                                       | 2                |                                 |
| <i>S. agalactiae</i>             | 1                |                             |                               |                                       | 1                |                                 |
| Beta-hemolytic streptococci      | 2                | 1                           |                               |                                       | 1                |                                 |
| <i>Cutibacterium acnes</i>       | 5 (6)            | 1                           | 1                             |                                       | 1                | 2                               |
| <i>Candida albicans</i>          | 2 (6)            |                             |                               | 1                                     | 1                |                                 |
| <i>Bacteroides fragilis</i>      | 1 (3)            | 1                           |                               |                                       |                  |                                 |
| Corynebacterium species          | 1 (3)            |                             |                               | 1                                     |                  |                                 |
| Polymicrobial                    | 13 (38)          | 3                           |                               | 4                                     | 5                | 1                               |

**Table S4** Microbiological characteristics of the 9 patients with failure with a new pathogen cultured

| Index pathogen(s)                                                                                                          | New pathogens(s)                                                                                                                                                                                                                               |
|----------------------------------------------------------------------------------------------------------------------------|------------------------------------------------------------------------------------------------------------------------------------------------------------------------------------------------------------------------------------------------|
| <i>Staphylococcus aureus</i> , <i>Pseudomonas aeruginosa</i> , <i>Enterococcus faecalis</i>                                | <i>Stenotrophomonas maltophilia</i> , <i>Achromobacter xylosoxidans</i> , <i>Enterococcus faecium</i> , <i>Candida albicans</i>                                                                                                                |
| <i>Staphylococcus haemolyticus</i> , <i>Pseudomonas aeruginosa</i> , <i>Enterococcus faecalis</i>                          | <i>Staphylococcus epidermidis</i>                                                                                                                                                                                                              |
| <i>Staphylococcus epidermidis</i><br><i>Staphylococcus aureus</i>                                                          | <i>Staphylococcus epidermidis</i> , Peptoniphilus species, <i>Prevotella melaninogenica</i><br><i>Enterococcus faecalis</i> , alpha hemolytic streptococci                                                                                     |
| <i>Staphylococcus epidermidis</i> , <i>Enterococcus faecalis</i> , <i>Escherichia coli</i><br><i>Staphylococcus aureus</i> | <i>Morganelli morgani</i> , <i>Bacteroides fragilis</i> , <i>Pseudomonas aeruginosa</i> , <i>Staphylococcus epidermidis</i><br><i>Enterococcus faecalis</i> , <i>Escherichia coli</i> , <i>Klebsiella pneumoniae</i> , <i>Proteus vulgaris</i> |
| <i>Candida albicans</i>                                                                                                    | <i>Enterococcus faecalis</i> , <i>Staphylococcus aureus</i>                                                                                                                                                                                    |
| <i>Staphylococcus epidermidis</i> , <i>Acinetobacter baumannii</i> , <i>Corynebacterium</i> species                        | Anaerococcus species                                                                                                                                                                                                                           |
| <i>Enterobacter cloacae</i>                                                                                                | <i>Streptococcus agalactiae</i>                                                                                                                                                                                                                |

**Table S5** Time to failure in 4 patients with development of resistance against suppressive antimicrobial treatment

| Index pathogen                            | Antibiotic treatment          | months of treatment till relapse |
|-------------------------------------------|-------------------------------|----------------------------------|
| <i>Staphylococcus aureus</i> <sup>a</sup> | flucloxacillin 1000 mg b.i.d. | 15                               |
| <i>Staphylococcus epidermidis</i>         | doxycycline 100 mg q.d.       | 9                                |
| <i>Staphylococcus epidermidis</i>         | flucloxacillin 500 mg t.i.d.  | 11                               |
| <i>Cutibacterium acnes</i>                | clindamycin 300 mg b.i.d.     | 22                               |

<sup>a</sup> cultures of relapse showed a borderline resistant *Staphylococcus aureus* (BORSA) with a MIC for oxacillin of 6 mg/L.

**Table S6** Analysis of clinical characteristics potentially associated with failure of suppressive antimicrobial therapy for patient with PJI (n=67)

|                                          | Failure<br>n (%) | Univariable analysis<br>HR (95% CI) | p-value | Multivariable analysis<br>HR (95% CI) | p-value |
|------------------------------------------|------------------|-------------------------------------|---------|---------------------------------------|---------|
| <b>Patient factors</b>                   |                  |                                     |         |                                       |         |
| Age >70                                  | 13 (43)          | 1.31 (0.61–2.79)                    | 0.49    |                                       |         |
| Smoker                                   | 5 (50)           | 2.06 (0.77–5.51)                    | 0.15    |                                       |         |
| Charlson comorbidity index >2            | 19 (37)          | 0.67 (0.29–1.55)                    | 0.35    |                                       |         |
| Diabetes mellitus                        | 4 (67)           | 4.08 (1.38–12.052)                  | 0.01    | 4.41 (1.41–13.76)                     | 0.01    |
| Previous PJI                             | 16 (49)          | 1.34 (0.62–2.89)                    | 0.45    |                                       |         |
| Revised prosthesis                       | 18 (51)          | 1.47 (0.66–3.27)                    | 0.35    |                                       |         |
| Chronic PJI                              | 18 (46)          | 1.46 (0.66–3.25)                    | 0.35    |                                       |         |
| Tumor endoprosthesis                     | 15 (40)          | 0.99 (0.46–2.11)                    | 0.97    |                                       |         |
| <b>Anatomic location</b>                 |                  |                                     |         |                                       |         |
| Hip                                      | 8 (25)           | 1                                   |         |                                       |         |
| Knee                                     | 13 (48)          | 2.29 (0.95–5.54)                    | 0.07    |                                       |         |
| Upper limb                               | 6 (75)           | 6.21 (2.07–18.59)                   | 0.01    | 3.95 (1.43–10.92)                     | 0.01    |
| <b>Microbiology</b>                      |                  |                                     |         |                                       |         |
| <i>Staphylococcus aureus</i>             | 5 (33)           | 0.86 (0.32–2.27)                    | 0.76    |                                       |         |
| Coagulase negative staphylococci         | 11 (44)          | 1.13 (0.52–2.44)                    | 0.76    |                                       |         |
| Streptococci                             | 3 (20)           | 0.29 (0.09–0.98)                    | 0.05    | 0.42 (0.12–1.45)                      | 0.17    |
| Enterococci                              | 5 (39)           | 1.12 (0.42–2.95)                    | 0.82    |                                       |         |
| Gram-negatives                           | 6 (50)           | 1.33 (0.54–3.31)                    | 0.54    |                                       |         |
| Polymicrobial infection                  | 13 (31)          | 1.03 (0.46–2.31)                    | 0.93    |                                       |         |
| <b>Clinical aspects</b>                  |                  |                                     |         |                                       |         |
| <12weeks antibiotic treatment before SAT | 17 (40)          | 1.12 (0.51–2.42)                    | 0.80    |                                       |         |
| C-Reactive protein at start SAT >=20     | 10 (46)          | 1.87 (0.82–4.30)                    | 0.14    |                                       |         |
| Low dosage SAT                           | 21 (45)          | 1.26 (0.51–3.13)                    | 0.62    | 1.05 (0.41–2.69)                      | 0.92    |
| No surgery performed                     | 7 (50)           | 1.45 (0.61–3.45)                    | 0.40    |                                       |         |
| <b>Indication SAT</b>                    |                  |                                     |         |                                       |         |
| “certain failure”                        | 21 (48)          | 2.10 (0.84–5.25)                    | 0.11    | 1.89 (0.71–5.02)                      | 1.89    |

The abbreviations used in the table are as follows: HR – hazard ratio; CI – confidence interval; SAT – suppressive antimicrobial therapy. <sup>a</sup> Reference

**Table S7** Reported side effects of suppressive antimicrobial treatment per antibiotic

| Antibiotic                    | Side effects (n) | Switch or stop SAT (n, %) |
|-------------------------------|------------------|---------------------------|
| Flucloxacillin                | GI (4)           | 4 (15)                    |
| Amoxicillin                   | GI (8)           | 3 (12)                    |
|                               | skin (1)         |                           |
| Amoxicillin/clavulanic acid   | GI (1)           | 0                         |
|                               | oral candida (1) |                           |
| Feneticillin                  | GI (2)           |                           |
| Clindamycin                   | GI (9)           | 7 (22)                    |
|                               | skin (1)         |                           |
|                               | liver (1)        |                           |
| Sulfamethoxazole/trimethoprim | GI (1)           | 1 (6)                     |
|                               | Renal (1)        |                           |
| Doxycycline                   | Skin (2)         | 2 (14)                    |
| Ciprofloxacin                 |                  | 0                         |
| Levofloxacin                  | Liver (1)        | 2 (40)                    |
|                               | Tendon (1)       |                           |
| Moxifloxacin                  |                  | 0                         |
| Linezolid                     | Skin (1)         | 1 (33)                    |
|                               | GI (1)           |                           |
| Rifampicin                    |                  | 0                         |
| Fluconazole                   | GI (1)           | 0                         |

The abbreviations used in the table are as follows: SAT - suppressive antimicrobial treatment; GI - gastrointestinal.
